# Supplementary material
Source: publisher site journal article supplement (https://www.dovepress.com/article/372961)
Supplement: Supplementary file 1 [file get_supplementary_file.php]

## Supplementary materials

|                 |        |                 |        |                   |        |
|-----------------|--------|-----------------|--------|-------------------|--------|
| Ctrl            | pm-Pac | Ctrl            | pm-Pac | Ctrl              | pm-Pac |
| Heart           |        | Aorta           |        | Spinal cord       |        |
| Ctrl            | pm-Pac | Ctrl            | pm-Pac | Ctrl              | pm-Pac |
| Lung            |        | Kidney          |        | Bladder           |        |
| Ctrl            | pm-Pac | Ctrl            | pm-Pac | Ctrl              | pm-Pac |
| Uterus          |        | Ovary           |        | Mammary gland     |        |
| Ctrl            | pm-Pac | Ctrl            | pm-Pac | Ctrl              | pm-Pac |
| Salivary gland  |        | Esophagus       |        | Pancreas          |        |
| Ctrl            | pm-Pac | Ctrl            | pm-Pac | Ctrl              | pm-Pac |
| Adrenal gland   |        | Thyroid         |        | Parathyroid gland |        |
| Ctrl            | pm-Pac | Ctrl            | pm-Pac | Ctrl              | pm-Pac |
| Ischiadic nerve |        | Hypophysis      |        | Trachea           |        |
| Ctrl            | pm-Pac | Ctrl            | pm-Pac | Ctrl              | pm-Pac |
| Stomach         |        | Small intestine |        | Large intestine   |        |

**Supplementary Figure 1. Pathological characteristics of the heart, aorta, spinal cord, etc. in healthy rats after administration of nanoparticle polymeric micellar paclitaxel (Pm-Pac) (40 mg/kg) for 5 consecutive weeks.** The organs, including the heart, aorta, spinal cord, lung, kidney, bladder, uterus, ovary, mammary gland, salivary gland, esophagus, pancreas, adrenal gland, thyroid, parathyroid gland, ischiadic nerve, hypophysis, trachea, stomach, small intestine, and large intestine, were normal ( $n = 10$ , HE $\times$ 100).



|              | Ctrl | pm | Sb-Pac | Pm-Pac |        |      |
|--------------|------|----|--------|--------|--------|------|
|              |      |    |        | Low    | Medium | High |
| Liver        |      |    |        |        |        |      |
| Spleen       |      |    |        |        |        |      |
| Lymph gland  |      |    |        |        |        |      |
| Thymus gland |      |    |        |        |        |      |
| Bone marrow  |      |    |        |        |        |      |
| Cerebrum     |      |    |        |        |        |      |
| Cerebellum   |      |    |        |        |        |      |
| Epididymis   |      |    |        |        |        |      |
| Prostate     |      |    |        |        |        |      |

Supplementary Figure 2. Pathological evaluation of nanoparticle polymeric micellar paclitaxel (Pm-Pac)-induced short-term toxicity in healthy rats. Liver:

mild extramedullary hematopoiesis in the solvent-based paclitaxel (Sb-Pac) group. Normal in the Pm-Pac group. **Spleen:** mild atrophy along with extramedullary hematopoiesis, reduced number of lymphocytes in splenic node and periarterial lymphatic sheath, accumulation of lymphocyte-like cell groups in red pulp, and increased multinuclear giant cells in Sb-Pac group. Mild atrophy and reduced number of lymphocytes in splenic nodes in the Pm-Pac (low and medium) groups. Mild atrophy, a reduced number of lymphocytes in splenic nodes, and increased multinuclear giant cells in red pulp were observed in the Pm-Pac (high) group. **Lymph gland:** mild atrophy and decreased lymphocytes in lymphoid nodule and deputy cortex in all Pm-Pac and Sb-Pac groups. **Thymus gland:** atrophy, decreased thymic cells, and epithelioid hyperplasia in all Pm-Pac and Sb-Pac groups. **Bone marrow:** atrophy and decreased levels of hematopoietic cells in the bone marrow cavity in all Pm-Pac and Sb-Pac groups. **Cerebrum:** multiple histiomalacia of cortex, nuclear debris and increased macrophages, gliocyte hyperplasia along with vacuolar degeneration of nerve fibers in the Sb-Pac group. Eight of 10 rats showed these pathological changes. Normal in all Pm-Pac groups. **Cerebellum:** degeneration and necrosis of neurocytes in the stratum granulosum, necrosis, nuclear pyknotic and histocyte infiltration in lesions. Three of 10 rats showed pathological changes. Normal in all Pm-Pac groups. **Epididymis:** atrophy, vacuolar lesions, interstitial edema, and diffuse hyperplasia of interstitial cells in all Pm-Pac and Sb-Pac groups. **Prostate:** atrophy in all Pm-Pac and Sb-Pac groups. ( $n = 10$ , HE $\times$ 100).



|                 |        |               |        |                  |        |
|-----------------|--------|---------------|--------|------------------|--------|
| Ctrl            | pm-Pac | Ctrl          | pm-Pac | Ctrl             | pm-Pac |
| Heart           |        | Aorta         |        | Spinal cord      |        |
| Ctrl            | pm-Pac | Ctrl          | pm-Pac | Ctrl             | pm-Pac |
| Spleen          |        | Lymph node    |        | Thymus gland     |        |
| Ctrl            | pm-Pac | Ctrl          | pm-Pac | Ctrl             | pm-Pac |
| Lung            |        | Kidney        |        | Bladder          |        |
| Ctrl            | pm-Pac | Ctrl          | pm-Pac | Ctrl             | pm-Pac |
| Uterus          |        | Ovary         |        | Mammary gland    |        |
| Ctrl            | pm-Pac | Ctrl          | pm-Pac | Ctrl             | pm-Pac |
| Salivary gland  |        | Esophagus     |        | Pancreas         |        |
| Ctrl            | pm-Pac | Ctrl          | pm-Pac | Ctrl             | pm-Pac |
| Adrenal gland   |        | Thyroid gland |        | Parathyrin gland |        |
| Ctrl            | pm-Pac | Ctrl          | pm-Pac | Ctrl             | pm-Pac |
| Ischiadic nerve |        | Hypophysis    |        | Trachea          |        |

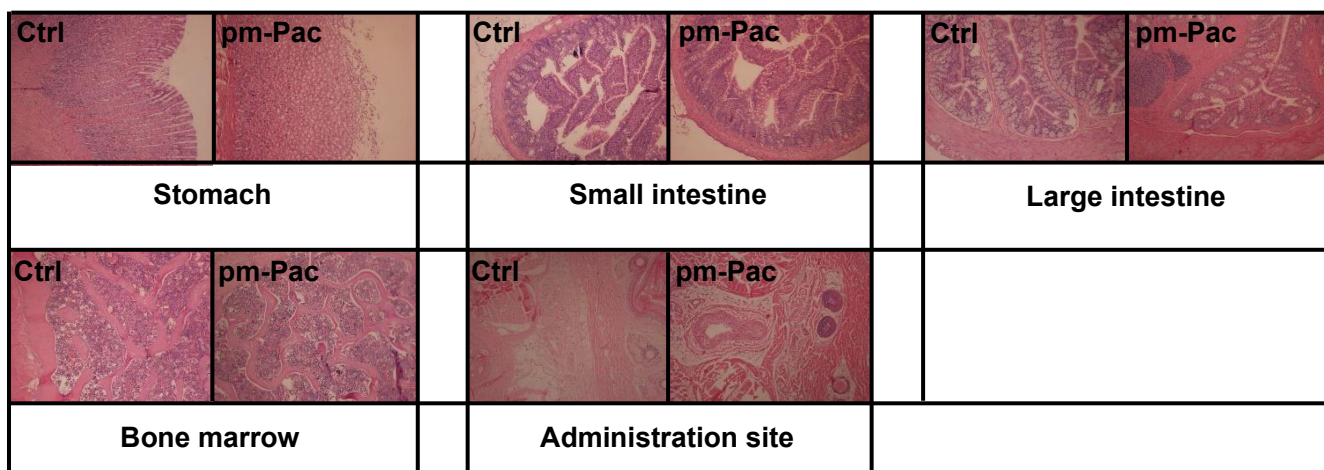

**Supplementary Figure 3. Pathological characteristics of the heart, aorta, spinal cord, etc. in healthy rats after administration of nanoparticle polymeric micellar paclitaxel (Pm-Pac) (40 mg/kg) for 5 consecutive weeks and then recovery for 6 weeks.** The organs, including the heart, aorta, spinal cord, spleen, lymph gland, thymus gland, lung, kidney, bladder, uterus, ovary, mammary gland, salivary gland, esophagus, pancreas, adrenal gland, thyroid, parathyroid gland, ischiadic nerve, hypophysis, trachea, stomach, small intestine, large intestine, bone marrow and administration site, were normal ( $n = 10$ , HE $\times$ 100).

|            | Ctrl                                                                              | pm                                                                                | Sb-Pac                                                                            | Pm-Pac                                                                             |                                                                                     |                                                                                     |
|------------|-----------------------------------------------------------------------------------|-----------------------------------------------------------------------------------|-----------------------------------------------------------------------------------|------------------------------------------------------------------------------------|-------------------------------------------------------------------------------------|-------------------------------------------------------------------------------------|
|            |                                                                                   |                                                                                   |                                                                                   | Low                                                                                | Medium                                                                              | High                                                                                |
| Cerebrum   | 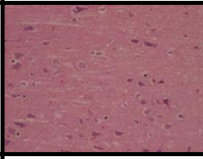 |  |  |  |  |  |
| Cerebellum |  |  |  |  |  |  |
| Prostate   |  |  |  |  |  |  |
| Liver      |  |  |  |  |  |  |

**Supplementary Figure 4. Pathological evaluation of nanoparticle polymeric micellar paclitaxel (Pm-Pac)-induced long-term toxicity in healthy rats. Cerebrum:** multiple histiomalacia of the cortex, nuclear debris, increased macrophages, and gliocyte hyperplasia along with vacuolar degeneration of nerve fibers in the Sb-Pac group. Two of 10 rats showed these pathological changes. Normal in all Pm-Pac groups. **Cerebellum:** degeneration and necrosis of neurocytes in the stratum granulosum, necrosis, nuclear pyknotic and histocyte infiltration in lesions. One of 10 rats showed pathological changes in the Sb-Pac group. Normal in all Pm-Pac groups. **Prostate:** mild atrophy in the Pm-Pac (medium and high) groups. Normal in the Sb-Pac group and Pm-Pac (low) group. **Liver:** microfocal necrosis, eosinophilic necrosis, and inflammatory cell infiltration in the Pm-Pac (high) group. One of 10 rats showed pathological changes. The other groups were normal. ( $n = 10$ , HE $\times$ 100).



## Supplementary Tables

**Supplementary Table 1. Pm-Pac-induced changes of organs' weight (Mean±SD, g) and index (Mean± SD,%) in healthy male rats.**

|                        | Time        | Body weight (g) | Thymus gland    |               | Testis          |                 | Epididymis      |                 |
|------------------------|-------------|-----------------|-----------------|---------------|-----------------|-----------------|-----------------|-----------------|
|                        |             |                 | Weight (g)      | Index         | Weight (g)      | Index           | Weight (g)      | Index           |
| <b>Ctrl</b>            | At 5 weeks  | 420.2±25.3      | 0.65±0.08       | 0.16±0.02     | 3.10±0.25       | 0.74±0.08       | 1.11±0.11       | 0.27±0.02       |
|                        | At 11 weeks | 530.2±19.6      | 0.45±0.07       | 0.09±0.01     | 3.31±0.26       | 0.62±0.03       | 1.26±0.07       | 0.24±0.01       |
| <b>Pm</b>              | At 5 weeks  | 404.8±15.8      | 0.56±0.09       | 0.14±0.02     | 3.06±0.27       | 0.76±0.05       | 0.99±0.05       | 0.25±0.01       |
|                        | At 11 weeks | 495.2±24.3      | 0.42±0.09       | 0.09±0.02     | 2.64±0.88       | 0.53±0.16       | 1.20±0.24       | 0.24±0.04       |
| <b>Sb-Pac</b>          | At 5 weeks  | 323.6±23.8      | 0.12±0.02**     | 0.04±0.01**   | 3.29±0.48       | 1.02±0.12**     | 1.01±0.29       | 0.31±0.08       |
|                        | At 11 weeks | 474.4±18.0      | 0.46±0.09       | 0.10±0.01     | 3.14±0.41       | 0.66±0.09       | 1.08±0.14       | 0.23±0.04       |
| <b>Pm-Pac (Low)</b>    | At 5 weeks  | 325.4±20.4      | 0.14±0.04***#   | 0.04±0.01***# | 2.31±0.25***#@@ | 0.71±0.10@@     | 0.66±0.12***#@  | 0.20±0.03*#@    |
|                        | At 11 weeks | 441.4±30.2      | 0.29±0.03***#@@ | 0.07±0.01*#@@ | 2.35±0.57**#@   | 0.53±0.11@      | 0.81±0.21***#@  | 0.18±0.04***#@  |
| <b>Pm-Pac (Medium)</b> | At 5 weeks  | 256.8±14.8      | 0.12±0.10***#   | 0.05±0.04***# | 0.85±0.12***#@@ | 0.33±0.05***#@@ | 0.33±0.09***#@@ | 0.13±0.03***#@@ |
|                        | At 11 weeks | 417.6±28.9      | 0.34±0.03*      | 0.08±0.01     | 1.07±0.13***#@@ | 0.25±0.03***#@@ | 0.56±0.11***#@@ | 0.13±0.02***#@@ |
| <b>Pm-Pac (High)</b>   | At 5 weeks  | 168.8±42.6      | 0.18±0.09***#   | 0.09±0.06***# | 0.68±0.21***#@@ | 0.33±0.05***#@@ | 0.28±0.12***#@@ | 0.13±0.03***#@@ |
|                        | At 11 weeks | 282.0±92.0      | 0.24±0.07***#@@ | 0.09±0.01     | 0.77±0.19***#@@ | 0.28±0.04***#@@ | 0.42±0.09***#@@ | 0.15±0.02***#@@ |

Note: \* represents  $P<0.05$  compared to Ctrl, \*\* represents  $P<0.01$  compared to Ctrl; # represents  $P<0.05$  compared to Pm, ## represents  $P<0.01$  compared to Pm; @ represents  $P<0.05$  compared to Sb-Pac, @@ represents  $P<0.01$  compared to Sb-Pac.



**Supplementary Table 2. Pm-Pac-induced hemopoietic toxicity in healthy SD rats (Mean ± SD).**

|                                |             | Ctrl        | Pm          | Sb-Pac         | Pm-Pac (Low)     | Pm-Pac (Medium) | Pm-Pac (High)    |
|--------------------------------|-------------|-------------|-------------|----------------|------------------|-----------------|------------------|
| <b>Rats (n)</b>                | At 5 weeks  | 10          | 10          | 10             | 10               | 10              | 8                |
|                                | At 11 weeks | 10          | 10          | 10             | 10               | 10              | 10               |
| <b>WBC (10<sup>3</sup>/uL)</b> | At 5 weeks  | 7.95±2.16   | 6.78±1.76   | 4.66±1.28**    | 4.32±1.34***#    | 3.62±0.72##     | 3.51±1.78***#    |
|                                | At 11 weeks | 6.89±2.68   | 6.94±2.80   | 4.63±1.36*     | 4.69±1.80**      | 4.73±1.80**     | 4.60±2.49        |
| <b>RBC (10<sup>6</sup>/uL)</b> | At 5 weeks  | 8.00±0.54   | 7.58±0.87   | 7.72±0.44      | 7.63±0.39        | 7.58±0.71       | 8.56±0.35***#    |
|                                | At 11 weeks | 8.46±0.79   | 8.46±0.75   | 8.13±0.80      | 8.30±0.35        | 8.38±0.47       | 8.27±0.45        |
| <b>HGB (g/dL)</b>              | At 5 weeks  | 139.8±4.64  | 135.6±11.82 | 138.10±8.48    | 136.00±5.60      | 135.70±6.04     | 142.75±7.74      |
|                                | At 11 weeks | 138.70±4.45 | 139.60±6.47 | 135.10±10.49   | 139.50±3.47      | 140.10±5.09     | 138.70±4.95      |
| <b>HCT (%)</b>                 | At 5 weeks  | 40.67±2.61  | 38.63±3.86  | 41.53±2.98     | 40.86±2.13       | 40.17±3.51      | 42.68±1.89#      |
|                                | At 11 weeks | 51.13±2.92  | 50.50±3.79  | 49.45±3.74     | 50.63±1.93       | 50.73±2.21      | 50.55±2.16       |
| <b>MCV (fL)</b>                | At 5 weeks  | 50.89±1.07  | 51.03±1.15  | 53.77±1.95***# | 53.56±1.53***#   | 53.03±0.93***#  | 49.88±1.29       |
|                                | At 11 weeks | 60.66±2.54  | 59.77±1.39  | 61.02±2.05     | 61.00±0.45#      | 60.60±1.96      | 61.20±1.85       |
| <b>MCH (pg)</b>                | At 5 weeks  | 17.56±0.84  | 17.92±0.98  | 17.88±0.64     | 17.85±0.37       | 17.99±1.13      | 16.69±0.72***#   |
|                                | At 11 weeks | 16.50±1.36  | 16.57±0.78  | 16.67±0.79     | 16.85±0.72       | 16.75±0.59      | 16.83±0.97       |
| <b>MCHC (g/dL)</b>             | At 5 weeks  | 345±17      | 351±14      | 333±9          | 333±9            | 339±19          | 335±11           |
|                                | At 11 weeks | 272±12      | 277±9       | 273±10         | 276±11           | 276±7           | 274±9            |
| <b>RDW (%)</b>                 | At 5 weeks  | 10.94±0.48  | 11.08±0.52  | 14.31±0.97     | 13.28±0.38***#@@ | 14.22±0.97***#  | 12.21±0.72***#@@ |
|                                | At 11 weeks | 12.07±0.59  | 12.08±0.68  | 12.25±2.47     | 11.76±0.63       | 11.84±0.56      | 12.14±1.17       |
| <b>PLT (10<sup>3</sup>/uL)</b> | At 5 weeks  | 1278±151    | 1175±138    | 1188±156       | 1301±91          | 1308±158        | 1272±188         |
|                                | At 11 weeks | 1060±243    | 1100±127    | 1106±241       | 1164±65          | 1154±116        | 1265±136         |
| <b>MPV (fL)</b>                | At 5 weeks  | 7.37±1.97   | 8.43±1.66   | 7.95±0.89      | 7.73±0.91        | 8.76±1.74       | 7.86±1.36        |
|                                | At 11 weeks | 7.23±1.07   | 7.56±1.24   | 7.70±0.89      | 8.18±0.86*       | 8.05±0.73       | 8.49±0.87**      |

|                                  |             |           |           |                         |                           |                           |                           |
|----------------------------------|-------------|-----------|-----------|-------------------------|---------------------------|---------------------------|---------------------------|
| <b>NEUT (10<sup>3</sup>/uL)</b>  | At 5 weeks  | 0.74±0.13 | 1.39±1.00 | 0.64±0.31               | 0.53±0.38 <sup>#</sup>    | 0.25±0.10 <sup>***#</sup> | 0.92±0.47                 |
|                                  | At 11 weeks | 0.84±0.45 | 0.86±0.41 | 0.63±0.21               | 0.70±0.35                 | 0.81±0.63                 | 0.87±0.48                 |
| <b>LYMPH (10<sup>3</sup>/uL)</b> | At 5 weeks  | 6.86±2.14 | 5.11±1.59 | 3.75±0.87 <sup>**</sup> | 3.49±0.86 <sup>***#</sup> | 3.13±0.58 <sup>***#</sup> | 2.42±1.44 <sup>***#</sup> |
|                                  | At 11 weeks | 5.70±2.38 | 5.78±2.42 | 3.76±1.11 <sup>*</sup>  | 3.74±1.43 <sup>**</sup>   | 3.69±0.87 <sup>**</sup>   | 3.50±1.91 <sup>**</sup>   |
| <b>MONO (10<sup>3</sup>/uL)</b>  | At 5 weeks  | 0.19±0.06 | 0.15±0.07 | 0.12±0.06               | 0.14±0.08                 | 0.09±0.03 <sup>***</sup>  | 0.09±0.09 <sup>**</sup>   |
|                                  | At 11 weeks | 0.19±0.09 | 0.17±0.08 | 0.11±0.05               | 0.15±0.08                 | 0.13±0.08                 | 0.12±0.12                 |
| <b>EOS (10<sup>3</sup>/uL)</b>   | At 5 weeks  | 0.05±0.02 | 0.04±0.02 | 0.05±0.03               | 0.04±0.02                 | 0.02±0.01 <sup>***</sup>  | 0.04±0.02                 |
|                                  | At 11 weeks | 0.08±0.04 | 0.06±0.01 | 0.04±0.01 <sup>**</sup> | 0.04±0.01 <sup>***#</sup> | 0.05±0.02                 | 0.04±0.02 <sup>*</sup>    |
| <b>BASO (10<sup>3</sup>/uL)</b>  | At 5 weeks  | 0.02±0.01 | 0.01±0.01 | 0.02±0.01               | 0.01±0.00                 | 0.01±0.00                 | 0.01±0.01                 |
|                                  | At 11 weeks | 0.02±0.01 | 0.01±0.01 | 0.01±0.01               | 0.01±0.01                 | 0.01±0.01                 | 0.01±0.01                 |
| <b>RETIC (10<sup>3</sup>/uL)</b> | At 5 weeks  | 185±35    | 150±42    | 281±96 <sup>**</sup>    | 315±77 <sup>***#</sup>    | 424±70 <sup>***#</sup>    | 115±64 <sup>**</sup>      |
|                                  | At 11 weeks | 131±28    | 108±30    | 146±149                 | 117±26                    | 104±23                    | 114±51                    |
| <b>PT (s)</b>                    | At 5 weeks  | 8.5±0.5   | 8.6±0.3   | 8.5±0.3                 | 8.5±0.4                   | 8.6±0.3                   | 8.5±0.2                   |
|                                  | At 11 weeks | 8.8±0.3   | 8.7±0.3   | 8.6±0.3 <sup>*</sup>    | 8.6±0.3                   | 8.6±0.3                   | 8.5±0.3                   |

Note: \* represents  $P<0.05$  compared to Ctrl, \*\* represents  $P<0.01$  compared to Ctrl; # represents  $P<0.05$  compared to Pm, ## represents  $P<0.01$  compared to Pm; @@ represents  $P<0.01$  compared to Sb-Pac.

**Supplementary Table 3. Pm-Pac-induced changes of blood biochemical indexes in healthy SD rats (Mean ± SD).**

|                      |             | Ctrl       | Pm         | Sb-Pac     | Pm-Pac (Low) | Pm-Pac (Medium) | Pm-Pac (High) |
|----------------------|-------------|------------|------------|------------|--------------|-----------------|---------------|
| <b>Rats (n)</b>      | At 5 weeks  | 10         | 10         | 10         | 10           | 10              | 8             |
|                      | At 11 weeks | 10         | 10         | 10         | 10           | 10              | 10            |
| <b>ALT(nmol/s.l)</b> | At 5 weeks  | 759±128    | 896±158*   | 658±181    | 1007±79**@@  | 1074±167***     | 1506±605***#  |
|                      | At 11 weeks | 882±94     | 873±190    | 840±171    | 911±149      | 839±139         | 1020±161*     |
| <b>AST(nmol/s.l)</b> | At 5 weeks  | 2188±388   | 2383±343   | 2021±294   | 2100±249#    | 2192±388        | 3592±1646**   |
|                      | At 11 weeks | 3334±607   | 3347±621   | 3231±558   | 3215±338     | 2828±408*#      | 3254±642      |
| <b>ALP(nmol/s.l)</b> | At 5 weeks  | 1972±520   | 2302±731   | 2386±451   | 2073±499     | 1949±484        | 2309±472      |
|                      | At 11 weeks | 1212±364   | 1210±386   | 1472±244   | 1445±564     | 1472±545        | 2042±762***#  |
| <b>GLU(mmol/L)</b>   | At 5 weeks  | 6.94±0.59  | 6.25±1.01  | 6.07±0.83* | 7.00±1.17    | 6.55±0.89       | 5.62±0.98**   |
|                      | At 11 weeks | 5.20±1.44  | 4.91±1.32  | 5.02±0.90  | 5.13±1.33    | 5.11±1.02       | 4.32±1.27     |
| <b>T.BIL(umol/L)</b> | At 5 weeks  | 0.65±.62   | 0.73±0.71  | 0.37±0.32  | 0.68±0.43    | 1.11±0.25*      | 0.87±0.49     |
|                      | At 11 weeks | 0.56±0.36  | 0.76±0.63  | 0.60±0.25  | 0.49±0.18    | 0.67±0.33       | 0.70±0.34     |
| <b>T.CHO(mmol/L)</b> | At 5 weeks  | 1.18±0.40  | 1.36±0.58  | 1.18±0.20  | 1.34±0.43    | 1.45±0.37       | 1.30±0.18     |
|                      | At 11 weeks | 1.61±0.25  | 1.43±0.30  | 1.51±0.28  | 1.57±0.23    | 1.44±0.31       | 1.55±0.27     |
| <b>ALB(g/L)</b>      | At 5 weeks  | 38.66±1.97 | 37.71±2.31 | 38.11±1.74 | 36.56±1.54*@ | 35.24±1.17***#  | 35.24±0.98*** |
|                      | At 11 weeks | 38.59±1.79 | 39.35±1.58 | 38.72±2.30 | 38.20±2.01   | 37.99±1.41      | 37.56±1.65#   |
| <b>T.P(g/L)</b>      | At 5 weeks  | 59.45±2.31 | 58.07±3.21 | 58.67±2.98 | 57.22±1.40*  | 55.27±2.05***   | 54.77±1.81*** |
|                      | At 11 weeks | 67.19±2.45 | 69.05±1.46 | 68.44±2.68 | 69.30±2.22   | 68.41±2.21      | 67.11±2.14#   |
| <b>BUN(mmol/L)</b>   | At 5 weeks  | 4.96±0.85  | 5.13±0.90  | 5.50±1.03  | 5.03±0.69    | 5.28±0.67       | 6.00±2.03     |
|                      | At 11 weeks | 7.23±1.72  | 6.91±0.94  | 7.09±0.63  | 6.90±1.20    | 7.24±1.22       | 7.47±1.24     |
| <b>CREA(umol/L)</b>  | At 5 weeks  | 66.87±2.38 | 65.66±4.19 | 65.08±5.62 | 62.26±3.1**  | 61.86±3.43***   | 57.45±3.89*** |
|                      | At 11 weeks | 48.86±4.83 | 52.70±4.60 | 51.10±4.82 | 51.46±4.69   | 51.11±5.36      | 47.02±4.22##  |



|                               |             |           |            |                        |                        |                         |                            |
|-------------------------------|-------------|-----------|------------|------------------------|------------------------|-------------------------|----------------------------|
| <b>CK(nmol/s.l)</b>           | At 5 weeks  | 8701±2812 | 9925±2141  | 8807±1466              | 7542±1848 <sup>#</sup> | 7824±3459               | 7443±3737                  |
|                               | At 11 weeks | 9620±2568 | 10113±3379 | 9588±2621              | 8183±1165              | 7993±2237               | 9596±2492                  |
| <b>TG(mmol/L)</b>             | At 5 weeks  | 0.53±0.22 | 0.54±0.21  | 0.44±0.11              | 0.40±0.06              | 0.46±0.13               | 0.35±0.06 <sup>*#</sup>    |
|                               | At 11 weeks | 0.43±0.11 | 0.46±0.15  | 0.48±0.28              | 0.47±0.24              | 0.38±0.11               | 0.45±0.30                  |
| <b>Na<sup>+</sup>(mmol/L)</b> | At 5 weeks  | 140.5±0.9 | 139.8±2.6  | 140.9±0.9              | 140.3±0.6              | 140.9±1.1               | 144.9±1.9 <sup>**###</sup> |
|                               | At 11 weeks | 141.8±1.4 | 142.4±0.8  | 143.0±0.7 <sup>*</sup> | 142.3±1.0              | 143.3±0.7 <sup>**</sup> | 142.9±1.6                  |
| <b>K<sup>+</sup>(mmol/L)</b>  | At 5 weeks  | 4.57±0.32 | 4.56±0.51  | 4.56±0.39              | 4.51±0.44              | 4.17±0.54               | 3.89±0.35 <sup>**###</sup> |
|                               | At 11 weeks | 4.62±0.67 | 4.34±0.46  | 4.39±0.33              | 4.39±0.44              | 4.23±0.40               | 4.26±0.41                  |
| <b>Cl<sup>-</sup>(mmol/L)</b> | At 5 weeks  | 105.5±1.3 | 104.6±3.1  | 105.8±1.1              | 105.5±1.0              | 105.3±0.9               | 109.4±1.6 <sup>**###</sup> |
|                               | At 11 weeks | 104.5±1.1 | 104.6±1.0  | 105.2±1.2              | 104.7±0.9              | 105.3±0.7               | 105.1±1.9                  |
| <b>TCa(mmol/L)</b>            | At 5 weeks  | 2.37±0.07 | 2.32±0.09  | 2.36±0.06              | 2.36±0.11              | 2.38±0.06               | 2.29±0.12                  |
|                               | At 11 weeks | 2.83±0.07 | 2.80±0.04  | 2.79±0.03              | 2.77±0.03 <sup>*</sup> | 2.77±0.04 <sup>*</sup>  | 2.79±0.08                  |

Note: \* represents  $P<0.05$  compared to Ctrl, \*\* represents  $P<0.01$  compared to Ctrl; <sup>#</sup> represents  $P<0.05$  compared to Pm, <sup>###</sup> represents  $P<0.01$  compared to Pm; <sup>@</sup> represents  $P<0.05$  compared to Sb-Pac, <sup>@@</sup> represents  $P<0.01$  compared to Sb-Pac.
